# Supplementary material
Source: PubMed Central journal article supplement (PMC2709465)

**Supplemental Table 1. PCR primers and expected PCR products**

| Sequence name | Primers                          | Product length (bp) |
|---------------|----------------------------------|---------------------|
| TRPM7-Forward | 5'-CCATACCATATTCTCCAAGGTTCC-3'   | 399                 |
| -Reverse      | 5'-CATTCTCTTCA GATCTGGAA GTT-3'  |                     |
| TRPM6-Forward | 5'- GCAGGGCCTGCAAATCAAAG-3'      | 478                 |
| -Reverse      | 5'- GAGGGCATA GTAAA GTTCTGGA-3'  |                     |
| GAPDH-Forward | 5'-ATGCTGGTGTGCTGA GTATGTCGTG-3' | 723                 |
| -Reverse      | 5'-TTACTCCTTGGA GGCCATGTA GG-3'  |                     |
| eNOS-Forward  | 5'-GTGATGGCGAAGCGA GTGAA G-3'    | 422                 |
| -Reverse      | 5'-CCGAGCCCGAACA CACA GAAC-3'    |                     |
| TRPC1-Forward | 5'-TTCTGTGGATTATTGGGATGA-3'      | 506                 |
| -Reverse      | 5'-CA GAACAAA GCAAAGCA GGTG-3'   |                     |

**Supplemental Figure 1. Effect of ion substitution on TRPM7-like current in HUVECs**

Whole-cell patch-clamp recording was performed on HUVECs (see Materials and Methods).

TRPM7-like current was activated with  $\text{Ca}^{2+}/\text{Mg}^{2+}$ -free ECF. (A) I-V relationship before and after replacing  $\text{Na}^+$  and  $\text{K}^+$  with choline. (B) I-V relationship before and after replacing chloride with gluconate.

The changes in junction potential following the ion substitution were calculated with pClamp and corrected for the plots (n = 4 - 5).

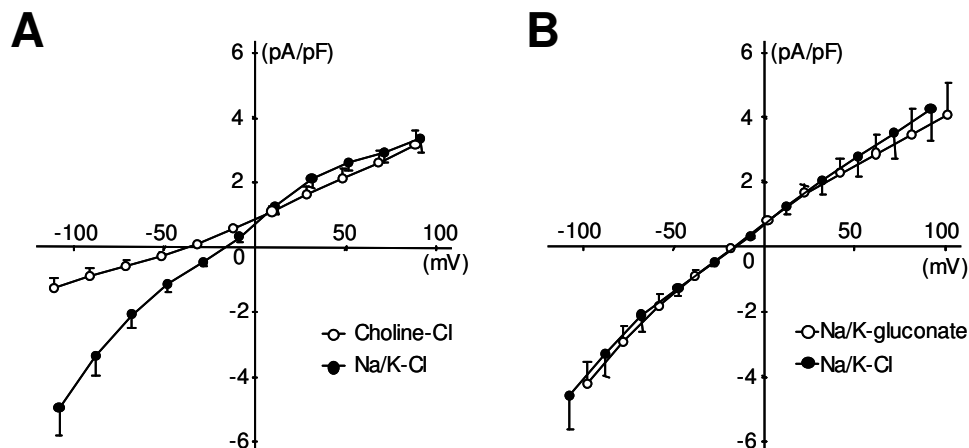

### Supplemental Figure 2. Effect of silencing TRPM7 by siRNA

HUVECs were transfected with either control or TRPM7-siRNA1. (A) RNAs were extracted at the indicated time after transfection. RT-PCR analysis shows reduced expression of TRPM7 mRNA by TRPM7-siRNA1 at day 2, 3, or 4. (B) RT-PCR result showing the lack of effect on the expression of TRPM6 or TRPC1 by TRPM7 siRNA1.

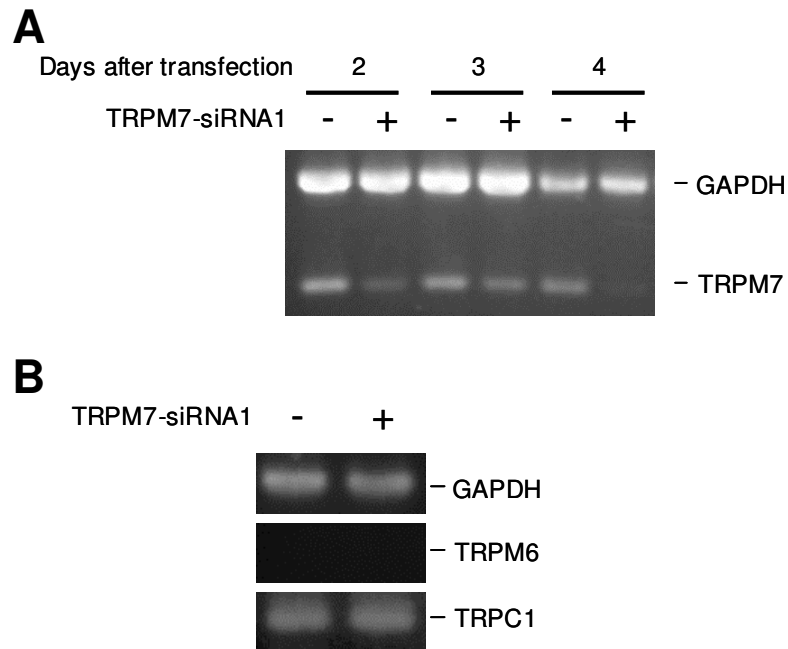

### Supplemental Figure 3. Effect of siRNA on the expression of TRPM7 channels in serum-starved HUVECs.

24h after transfection, cells were incubated in a defined, serum-free medium for 48h. (A) RT-PCR analysis shows the maintenance of TRPM7 expression in serum-starved HUVECs, and reduced

expression of TRPM7 mRNA in these cells by TRPM7-siRNA1. (B) Representative I-V relationship for

TRPM7-like current taken from serum-starved HUVECs. The current was inhibited by 10  $\mu\text{mol/L}$   $\text{Gd}^{3+}$ .

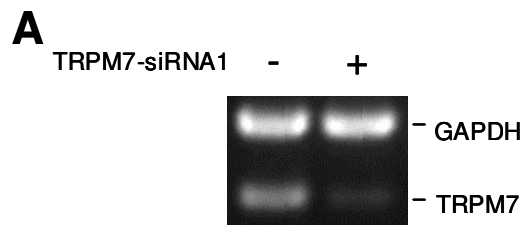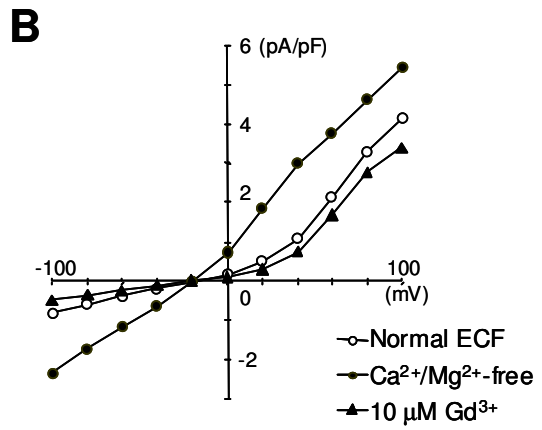

Supplement: cvp153_1.pdf [file cvp153_1.pdf]
